# Supplementary material
Source: PubMed Central journal article supplement (PMC7311059)
Supplement: ja0c00647_si_001.pdf [file ja0c00647_si_001.pdf]

# Local structure and dynamics in methylammonium, formamidinium and cesium tin(II) mixed-halide perovskites from $^{119}\text{Sn}$ solid-state NMR

Dominik J. Kubicki,<sup>a,b</sup> Daniel Prochowicz,<sup>d</sup> Elodie Salager,<sup>f,g</sup> Aydar Rakhmatullin,<sup>f</sup> Clare P. Grey<sup>\*b</sup>, Lyndon Emsley<sup>\*c</sup>, Samuel Stranks<sup>\*a</sup>

<sup>a</sup>*Cavendish Laboratory, Department of Physics, University of Cambridge, JJ Thomson Avenue, Cambridge, CB3 0HE, UK*

<sup>b</sup>*Department of Chemistry, University of Cambridge, Lensfield Road, Cambridge, CB2 1EW, UK*

<sup>c</sup>*Laboratory of Magnetic Resonance, Institute of Chemical Sciences and Engineering, Ecole Polytechnique Fédérale de Lausanne (EPFL), CH-1015 Lausanne, Switzerland*

<sup>d</sup>*Institute of Physical Chemistry, Polish Academy of Sciences, Kasprzaka 44/52, 01-224 Warsaw, Poland*

<sup>e</sup>*Laboratory of Photonics and Interfaces, Institute of Chemical Sciences and Engineering, Ecole Polytechnique Fédérale de Lausanne (EPFL), CH-1015 Lausanne, Switzerland*

<sup>f</sup>*Conditions Extrêmes et Matériaux: Haute Température et Irradiation (CEMHTI), UPR 3079 CNRS, Université d'Orléans, 1D Avenue de la Recherche Scientifique, Orléans 45071, France*

<sup>g</sup>*Réseau sur le Stockage Electrochimique de l'Energie (RS2E), FR 3459 CNRS, 33 Rue Saint Leu, Amiens 80039, France*

## Table of contents

|                                    |           |
|------------------------------------|-----------|
| <b>List of figures and tables</b>  | <b>1</b>  |
| <b>Synthesis of the materials</b>  | <b>3</b>  |
| <b>Supplementary Note 1</b>        | <b>7</b>  |
| <b>Supplementary Note 2</b>        | <b>7</b>  |
| <b>Details of NMR measurements</b> | <b>9</b>  |
| <b>XRD data</b>                    | <b>12</b> |

## List of figures and tables

Figure S1. Echo-detected  $^{119}\text{Sn}$  MAS NMR spectra of  $\text{MASnBr}_3$  at 4.7 T, 298 K and 12 kHz MAS using a refocusing echo period of (a) 16.7  $\mu\text{s}$  (asynchronous), (b) 83.3  $\mu\text{s}$  (rotor synchronized). The rotor-synchronized echo period does not lead to the appearance of spinning sidebands and its only effect is lower signal intensity due to fast transverse relaxation. Number of scans: (a) 1024, (b) 4096. Recycle delay: 50 ms. 4

Figure S2.  $^1\text{H}$ - $^{13}\text{C}$  CP MAS NMR spectra at 11.7 T, 100 K and 12 kHz MAS of (a)  $\text{MASnI}_3$ , (b)  $\text{MASnI}_{1.5}\text{Br}_{1.5}$ , (c)  $\text{MASnBr}_3$ , (d)  $\text{MASnBr}_{1.5}\text{Cl}_{1.5}$ , (e)  $\text{MASnCl}_3$ , (f)  $\text{MASnCl}_{1.5}\text{I}_{1.5}$ . The well-resolved features in panels c and e correspond to distinct MA environments present in the low-symmetry low temperature phases of  $\text{MASnBr}_3$  and  $\text{MASnCl}_3$ , respectively. The spectra of mixed-halide compositions are broader as compared to the single halide materials, consistent with the presence of halide disorder. Recycle delay: 2 s. Number of scans: 256-1024.  $^1\text{H}$  decoupling: 100 kHz (SPINAL-64). Contact time: 1 ms. 4

Figure S3.  $^{14}\text{N}$  MAS NMR echo-detected spectra at 11.7 T, 298 K and 5 kHz MAS of (a)  $\text{MASnI}_3$ , (b)  $\text{FASnI}_3$ , (c)  $\text{MA}_{0.25}\text{FA}_{0.75}\text{SnI}_3$ . The broadening of the spinning sideband manifold in the mixed-cation case (panel c) is indicative of lowering of the cubooctahedral symmetry. Recycle delay: 0.3 s. RF strength: 62.5 kHz. 5

|                                                                                                                                                                                                                                                                                                                                                                                                                                                                                                                                                                                                                                                                                                                                                                                                                                                                                                                                                                                                                                                                                                                                                                                                                                                                                                                                                                                                                |    |
|----------------------------------------------------------------------------------------------------------------------------------------------------------------------------------------------------------------------------------------------------------------------------------------------------------------------------------------------------------------------------------------------------------------------------------------------------------------------------------------------------------------------------------------------------------------------------------------------------------------------------------------------------------------------------------------------------------------------------------------------------------------------------------------------------------------------------------------------------------------------------------------------------------------------------------------------------------------------------------------------------------------------------------------------------------------------------------------------------------------------------------------------------------------------------------------------------------------------------------------------------------------------------------------------------------------------------------------------------------------------------------------------------------------|----|
| Figure S4. $^{133}\text{Cs}$ MAS NMR echo-detected spectra at 16.4 T, 298 K and 12 kHz MAS of (a) $\text{CsSnI}_3$ , (b) $\text{CsSnBr}_3$ , (c) $\text{CsSnCl}_3$ . The similarity of $^{133}\text{Cs}$ shift of $\text{CsSnBr}_3$ and $\text{CsSnCl}_3$ is coincidental as the compounds are cubic and monoclinic at room temperature, respectively. $^{133}\text{Cs}$ resonances in 3D halide perovskites have been shown to be strongly temperature dependent and an upfield shift (to lower ppm values) is expected on increasing the temperature and symmetry in $\text{CsSnCl}_3$ , consistent with previous reports. <sup>1,2</sup> Recycle delay: (a) 120 s, (b) 40 s, (c) 40 s. RF strength: 27.8 kHz.                                                                                                                                                                                                                                                                                                                                                                                                                                                                                                                                                                                                                                                                                               | 5  |
| Figure S5. A plot of the relaxation rate $R$ ( $R=1/T_1$ ) of the variable-temperature $T_1$ relaxation data for $\text{MASnBr}_3$ at 16.4 T as a function of the square of temperature. The dependence would be linear if relaxation was dominated by spin-phonon Raman scattering. <sup>3</sup>                                                                                                                                                                                                                                                                                                                                                                                                                                                                                                                                                                                                                                                                                                                                                                                                                                                                                                                                                                                                                                                                                                              | 6  |
| Figure S6. The effect of spinning on $^{119}\text{Sn}$ NMR spectra and $T_1$ relaxation of tin(II) halide perovskites: (a) $\text{FASnI}_3$ (red: static, green: 12 kHz MAS), (b) $\text{MASnBr}_3$ (red: static, green 1.5 kHz MAS, blue: 12 kHz MAS), (c) $\text{FASnBr}_3$ (red: static, green: 1.5 kHz MAS). The use of MAS does not lead to shortening of the $T_1$ which excludes MAS-induced heteronuclear polarization exchange as a possible relaxation mechanism in $\text{MASnBr}_3$ . The slight shortening of $T_1$ on going from 1.5 to 12 kHz (panel b) is a temperature-induced effect.                                                                                                                                                                                                                                                                                                                                                                                                                                                                                                                                                                                                                                                                                                                                                                                                        | 6  |
| Figure S7. <i>WSolids1</i> ( <i>WSolids1 ver. 1.21.3, K. Eichele, Universität Tübingen, 2015</i> ) line shape simulations in the extreme narrowing regime of (a) $\text{MASnBr}_3$ , (b) $\text{MASnI}_3$ , (c,d) $\text{CsSnI}_3$ . The relevant simulation parameters are given below the spectra. exp – experimental spectrum, sim – simulated spectrum, J – $^{119}\text{Sn}$ -X J-coupling, d – $^{119}\text{Sn}$ -X dipole coupling, $T_{1q}$ – estimated $T_1$ relaxation of the quadrupolar nucleus. Dipolar couplings expected based on the crystal structures (Sn-X distance = 2.9-3.1 Å) are as follows: $^{119}\text{Sn}$ - $^{81}\text{Br}$ : d = -410 Hz, $^{119}\text{Sn}$ - $^{79}\text{Br}$ : d = -380 Hz, $^{119}\text{Sn}$ - $^{127}\text{I}$ : d = -304 Hz. The width of the spectrum is largely determined by the magnitude of J while d introduces a small asymmetry and $T_{1q}$ determines the line broadening in the extreme narrowing regime. In the case of $\text{CsSnI}_3$ , the asymmetry is reproduced well with a d value larger than the coupling expected based on the crystal structure (panel c). Using the coupling strength based on the crystal structure leads to a more symmetric simulated spectrum (panel d). Since the spectra are echo-acquired, we expect that the slight asymmetry may be an artifact caused by anisotropic $^{119}\text{Sn}$ $T_2$ relaxation. | 7  |
| Figure S8. Powder X-ray diffraction patterns of the materials reported in Figure 2 of the main text.                                                                                                                                                                                                                                                                                                                                                                                                                                                                                                                                                                                                                                                                                                                                                                                                                                                                                                                                                                                                                                                                                                                                                                                                                                                                                                           | 13 |
| Figure S9. Powder X-ray diffraction patterns of the materials reported in Figure 3 of the main text. The asterisks indicate the corresponding oxidized $\text{A}_2\text{SnX}_6$ phase which slowly forms during the XRD measurement which is carried out in air.                                                                                                                                                                                                                                                                                                                                                                                                                                                                                                                                                                                                                                                                                                                                                                                                                                                                                                                                                                                                                                                                                                                                               | 14 |
| Figure S10. Powder X-ray diffraction patterns of the materials reported in Figure 4a-c of the main text. The asterisks indicate the corresponding oxidized $\text{A}_2\text{SnX}_6$ phase which slowly forms during the XRD measurement which is carried out in air.                                                                                                                                                                                                                                                                                                                                                                                                                                                                                                                                                                                                                                                                                                                                                                                                                                                                                                                                                                                                                                                                                                                                           | 15 |
| Figure S11. Powder X-ray diffraction patterns of the materials reported in Figure 4d-m of the main text.                                                                                                                                                                                                                                                                                                                                                                                                                                                                                                                                                                                                                                                                                                                                                                                                                                                                                                                                                                                                                                                                                                                                                                                                                                                                                                       | 15 |
| Figure S12. Powder X-ray diffraction patterns of the materials reported in Figure 5 of the main text.                                                                                                                                                                                                                                                                                                                                                                                                                                                                                                                                                                                                                                                                                                                                                                                                                                                                                                                                                                                                                                                                                                                                                                                                                                                                                                          | 16 |
| Table S1. Chemical shifts and peak widths of the multi-field variable-temperature $T_1$ relaxation data of $\text{MASnBr}_3$ , measured using a saturation recovery sequence and a Hahn echo in the quasi-static regime: total echo duration 40 $\mu\text{s}$ at 17.6 and 4.7 T, and 66.7 $\mu\text{s}$ at 9.4 T. The uncertainties of the monoexponential $T_1$ fit are <1 %.                                                                                                                                                                                                                                                                                                                                                                                                                                                                                                                                                                                                                                                                                                                                                                                                                                                                                                                                                                                                                                 | 9  |
| Table S2. An Arrhenius fit of the $T_1$ relaxation data (abscissa: $1/T$ , ordinate: $\ln(T_1/s)$ ) to the equation: $y= a+b\cdot x$ for $\text{MASnBr}_3$ . The errors of the least-squares fit are given as one standard deviation. The error of the average is given as one standard deviation of the average. $R = 8.3144598 \text{ J}/(\text{K}\cdot\text{mol})$ .                                                                                                                                                                                                                                                                                                                                                                                                                                                                                                                                                                                                                                                                                                                                                                                                                                                                                                                                                                                                                                        | 10 |
| Table S3. $^{119}\text{Sn}$ $T_1$ values measured using a saturation-recovery sequence and fitted using a monoexponential function. The uncertainties of the fit are <1 %.                                                                                                                                                                                                                                                                                                                                                                                                                                                                                                                                                                                                                                                                                                                                                                                                                                                                                                                                                                                                                                                                                                                                                                                                                                     | 10 |
| Table S4. Acquisition and processing parameters used for the spectra in the main text.                                                                                                                                                                                                                                                                                                                                                                                                                                                                                                                                                                                                                                                                                                                                                                                                                                                                                                                                                                                                                                                                                                                                                                                                                                                                                                                         | 10 |
| Table S5. Summary of the degradation products of tin(II) halide perovskites detected using $^{119}\text{Sn}$ MAS NMR. Note that not all possible degradation products were detected for all samples - see the discussion in the main text for details.                                                                                                                                                                                                                                                                                                                                                                                                                                                                                                                                                                                                                                                                                                                                                                                                                                                                                                                                                                                                                                                                                                                                                         | 12 |

## Synthesis of the materials

**MASnCl<sub>6</sub>**: MACl (68 mg, 1.00 mmol), SnCl<sub>2</sub> (190 mg, 1.00 mmol),

**MASnBr<sub>3</sub>**: MABr (112 mg, 1.00 mmol), SnBr<sub>2</sub> (279 mg, 1.00 mmol),

**MASnI<sub>3</sub>**: MAI (159 mg, 1.00 mmol), SnI<sub>2</sub> (373 mg, 1.00 mmol),

**MASnCl<sub>2.7</sub>Br<sub>0.3</sub>**: MACl (61 mg, 0.9 mmol), MABr (11 mg, 0.1 mmol), SnCl<sub>2</sub> (171 mg, 0.9 mmol), SnBr<sub>2</sub> (28 mg, 0.1 mmol)

**MASnCl<sub>2.1</sub>Br<sub>0.9</sub>**: MACl (47 mg, 0.7 mmol), MABr (34 mg, 0.3 mmol), SnCl<sub>2</sub> (133 mg, 0.7 mmol), SnBr<sub>2</sub> (84 mg, 0.3 mmol)

**MASnCl<sub>1.5</sub>Br<sub>1.5</sub>**: MACl (34 mg, 0.5 mmol), MABr (56 mg, 0.5 mmol), SnCl<sub>2</sub> (95 mg, 0.5 mmol), SnBr<sub>2</sub> (139 mg, 0.5 mmol)

**MASnCl<sub>2.7</sub>I<sub>0.3</sub>**: MACl (61 mg, 0.9 mmol), MAI (16 mg, 0.1 mmol), SnCl<sub>2</sub> (171 mg, 0.9 mmol), SnI<sub>2</sub> (37 mg, 0.1 mmol)

**MASnBr<sub>0.9</sub>I<sub>2.1</sub>**: MABr (34 mg, 0.3 mmol), MAI (111 mg, 0.7 mmol), SnBr<sub>2</sub> (84 mg, 0.3 mmol), SnI<sub>2</sub> (261 mg, 0.7 mmol)

**MASnBr<sub>1.5</sub>I<sub>1.5</sub>**: MABr (56 mg, 0.5 mmol), MAI (79 mg, 0.5 mmol), SnBr<sub>2</sub> (139 mg, 0.5 mmol), SnI<sub>2</sub> (186 mg, 0.5 mmol)

**MASnBr<sub>2.1</sub>I<sub>0.9</sub>**: MABr (78 mg, 0.7 mmol), MAI (48 mg, 0.3 mmol), SnBr<sub>2</sub> (195 mg, 0.7 mmol), SnI<sub>2</sub> (112 mg, 0.3 mmol)

**MASnBr<sub>2.55</sub>I<sub>0.45</sub>**: MABr (95 mg, 0.85 mmol), MAI (24 mg, 0.25 mmol), SnBr<sub>2</sub> (237 mg, 0.85 mmol), SnI<sub>2</sub> (56 mg, 0.25 mmol)

**MASnBr<sub>2.7</sub>I<sub>0.3</sub>**: MABr (101 mg, 0.9 mmol), MAI (16 mg, 0.1 mmol), SnBr<sub>2</sub> (251 mg, 0.9 mmol), SnI<sub>2</sub> (37 mg, 0.1 mmol)

**MA<sub>2</sub>SnBr<sub>6</sub>**: MABr (224 mg, 2.00 mmol), SnBr<sub>4</sub> (438 mg, 1.00 mmol),

**MA<sub>2</sub>SnI<sub>6</sub>**: MAI (318 mg, 2.00 mmol), SnI<sub>4</sub> (626 mg, 1.00 mmol),

**FASnI<sub>3</sub>**: FAI (172 mg, 1.00 mmol), SnI<sub>2</sub> (373 mg, 1.00 mmol),

**FASnBr<sub>3</sub>**: FABr (125 mg, 1.00 mmol), SnBr<sub>2</sub> (279 mg, 1.00 mmol),

**FASnCl<sub>3</sub>**: FACl (81 mg, 1.00 mmol), SnCl<sub>2</sub> (190 mg, 1.00 mmol),

**MA<sub>0.5</sub>FA<sub>0.5</sub>SnBr<sub>3</sub>**: MABr (56 mg, 0.5 mmol), FABr (62 mg, 0.5 mmol), SnBr<sub>2</sub> (279 mg, 1.00 mmol),

**MA<sub>0.5</sub>FA<sub>0.5</sub>SnCl<sub>3</sub>**: MACl (34 mg, 0.5 mmol), FACl (40 mg, 0.5 mmol), SnCl<sub>2</sub> (190 mg, 1.00 mmol),

**CsSnI<sub>3</sub>**: Csl (260 mg, 1.00 mmol), SnI<sub>2</sub> (373 mg, 1.00 mmol),

**CsSnBr<sub>3</sub>**: CsBr (213 mg, 1.00 mmol), SnBr<sub>2</sub> (279 mg, 1.00 mmol),

**CsSnCl<sub>3</sub>**: CsCl (168 mg, 1.00 mmol), SnCl<sub>2</sub> (190 mg, 1.00 mmol),

**CsSnCl<sub>1.5</sub>Br<sub>1.5</sub>**: CsCl (168 mg, 1.00 mmol), SnCl<sub>2</sub> (95 mg, 0.5 mmol), SnBr<sub>2</sub> (139 mg, 0.5 mmol),

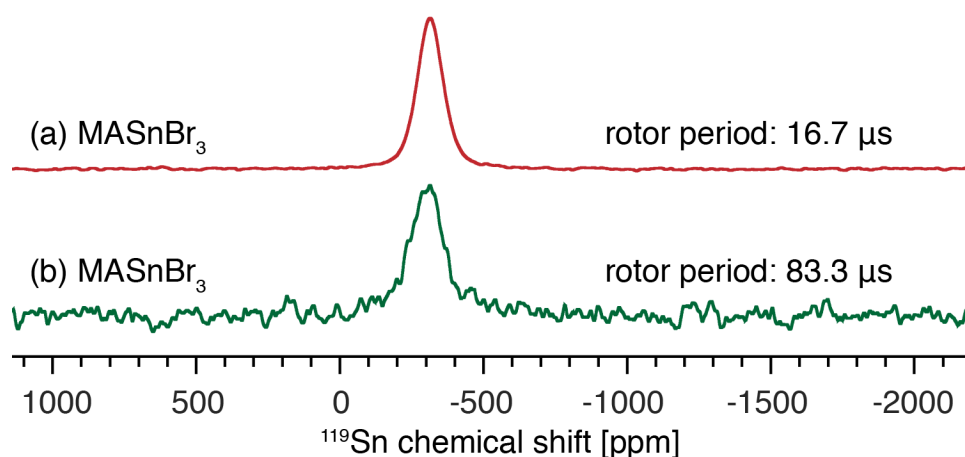

Figure S1. Echo-detected  $^{119}\text{Sn}$  MAS NMR spectra of  $\text{MASnBr}_3$  at 4.7 T, 298 K and 12 kHz MAS using a refocusing echo period of (a)  $16.7\ \mu\text{s}$  (asynchronous), (b)  $83.3\ \mu\text{s}$  (rotor synchronized). The rotor-synchronized echo period does not lead to the appearance of spinning sidebands and its only effect is lower signal intensity due to fast transverse relaxation. Number of scans: (a) 1024, (b) 4096. Recycle delay: 50 ms.

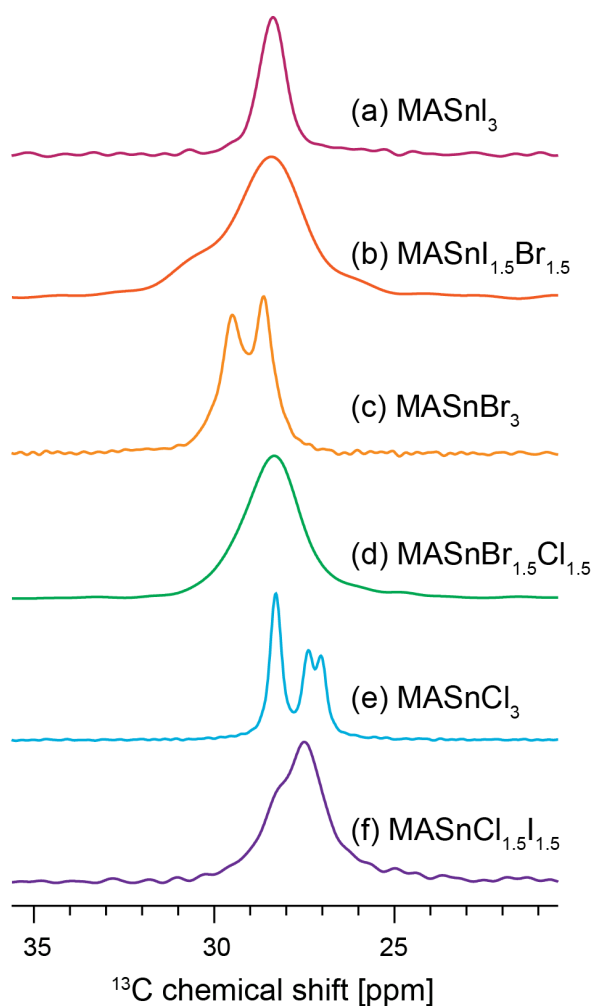

Figure S2.  $^1\text{H}$ - $^{13}\text{C}$  CP MAS NMR spectra at 11.7 T, 100 K and 12 kHz MAS of (a)  $\text{MASnI}_3$ , (b)  $\text{MASnI}_{1.5}\text{Br}_{1.5}$ , (c)  $\text{MASnBr}_3$ , (d)  $\text{MASnBr}_{1.5}\text{Cl}_{1.5}$ , (e)  $\text{MASnCl}_3$ , (f)  $\text{MASnCl}_{1.5}\text{I}_{1.5}$ . The well-resolved features in panels c and e correspond to distinct MA environments present in the low-symmetry low temperature phases of  $\text{MASnBr}_3$  and  $\text{MASnCl}_3$ , respectively. The spectra

of mixed-halide compositions are broader as compared to the single halide materials, consistent with the presence of halide disorder. Recycle delay: 2 s. Number of scans: 256-1024.  $^1\text{H}$  decoupling: 100 kHz (SPINAL-64). Contact time: 1 ms.

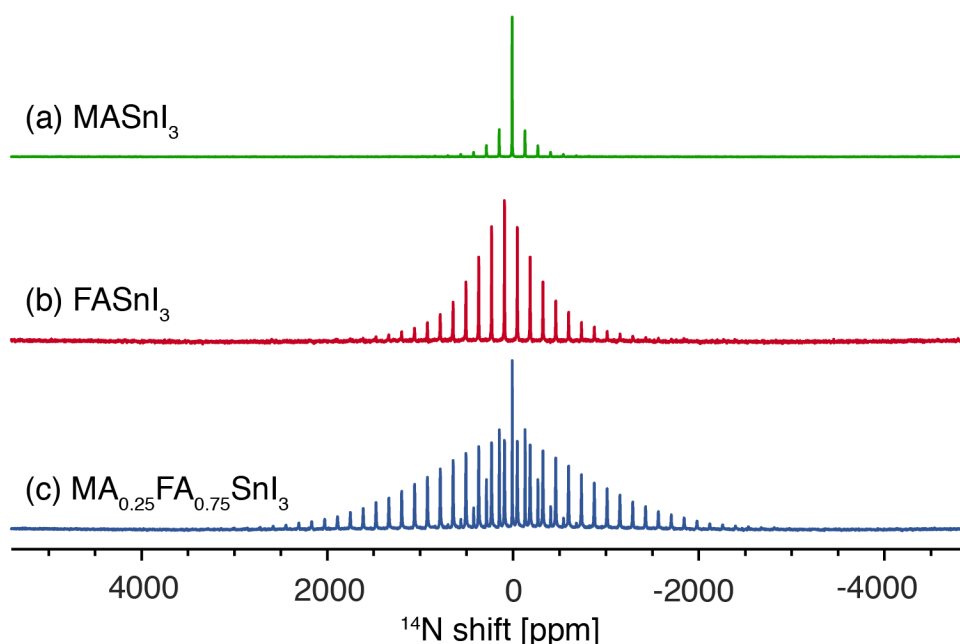

Figure S3.  $^{14}\text{N}$  MAS NMR echo-detected spectra at 11.7 T, 298 K and 5 kHz MAS of (a)  $\text{MASnI}_3$ , (b)  $\text{FASnI}_3$ , (c)  $\text{MA}_{0.25}\text{FA}_{0.75}\text{SnI}_3$ . The broadening of the spinning sideband manifold in the mixed-cation case (panel c) is indicative of lowering of the cubooctahedral symmetry. Recycle delay: 0.3 s. RF strength: 62.5 kHz.

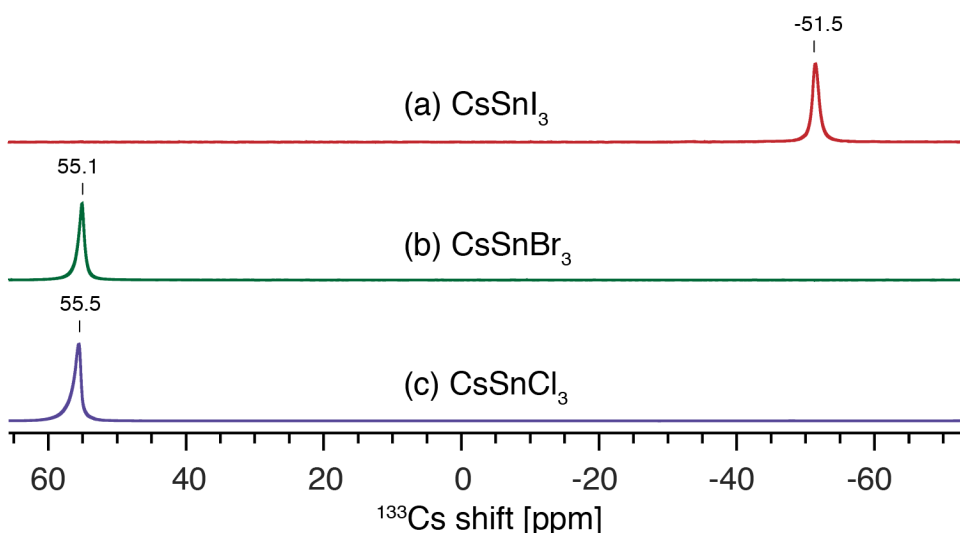

Figure S4.  $^{133}\text{Cs}$  MAS NMR echo-detected spectra at 16.4 T, 298 K and 12 kHz MAS of (a)  $\text{CsSnI}_3$ , (b)  $\text{CsSnBr}_3$ , (c)  $\text{CsSnCl}_3$ . The similarity of  $^{133}\text{Cs}$  shift of  $\text{CsSnBr}_3$  and  $\text{CsSnCl}_3$  is coincidental as the compounds are cubic and monoclinic at room temperature, respectively.  $^{133}\text{Cs}$  resonances in 3D halide perovskites have been shown to be strongly temperature dependent and an upfield shift (to lower ppm values) is expected on increasing the temperature and symmetry in  $\text{CsSnCl}_3$ , consistent with previous reports.<sup>1,2</sup> Recycle delay: (a) 120 s, (b) 40 s, (c) 40 s. RF strength: 27.8 kHz.

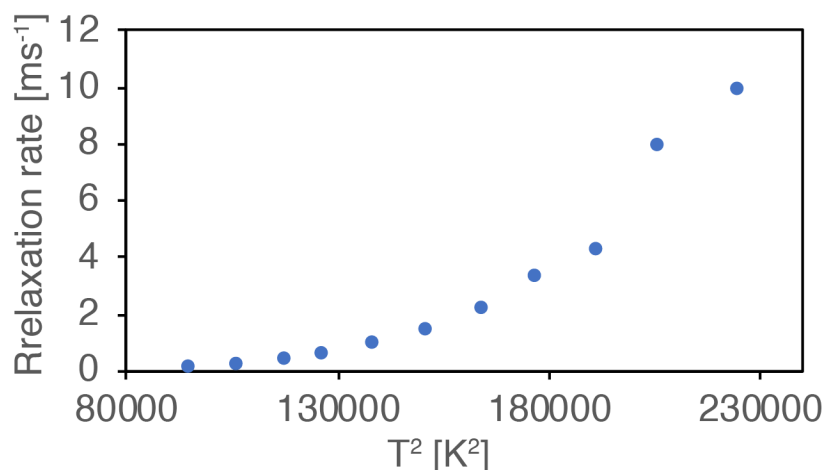

Figure S5. A plot of the relaxation rate  $R$  ( $R=1/T_1$ ) of the variable-temperature  $T_1$  relaxation data for  $\text{MASnBr}_3$  at 16.4 T as a function of the square of temperature. The dependence would be linear if relaxation was dominated by spin-phonon Raman scattering.<sup>3</sup>

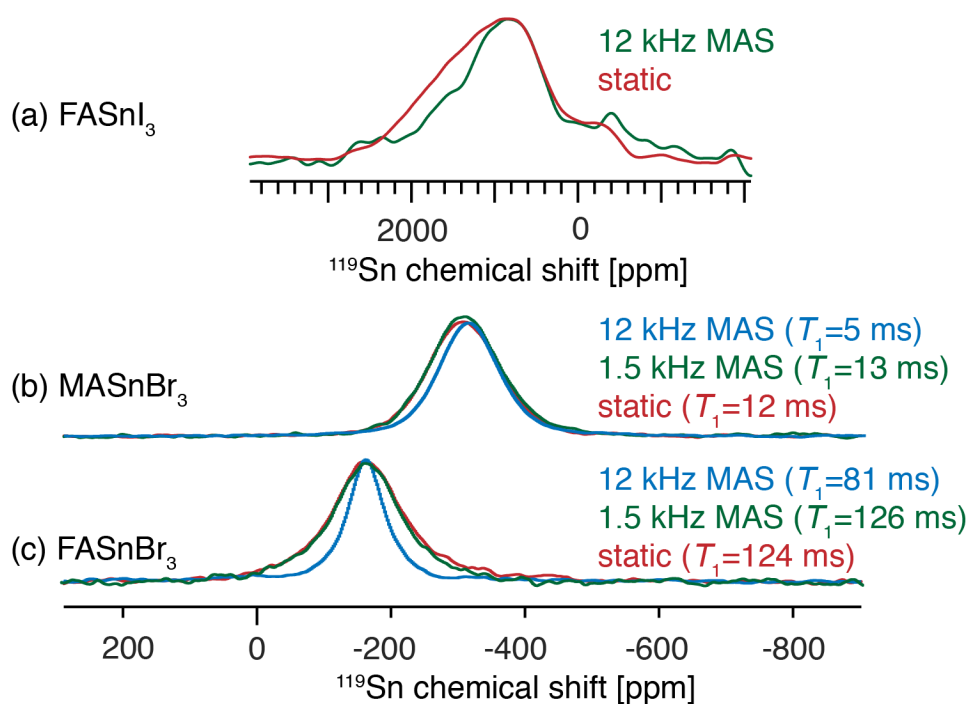

Figure S6. The effect of spinning on  $^{119}\text{Sn}$  NMR spectra and  $T_1$  relaxation of tin(II) halide perovskites: (a)  $\text{FASnI}_3$  (red: static, green: 12 kHz MAS), (b)  $\text{MASnBr}_3$  (red: static, green 1.5 kHz MAS, blue: 12 kHz MAS), (c)  $\text{FASnBr}_3$  (red: static, green: 1.5 kHz MAS). The use of MAS does not lead to shortening of the  $T_1$  which excludes MAS-induced heteronuclear polarization exchange as a possible relaxation mechanism in  $\text{MASnBr}_3$ . The slight shortening of  $T_1$  on going from 1.5 to 12 kHz (panel b) is a temperature-induced effect.

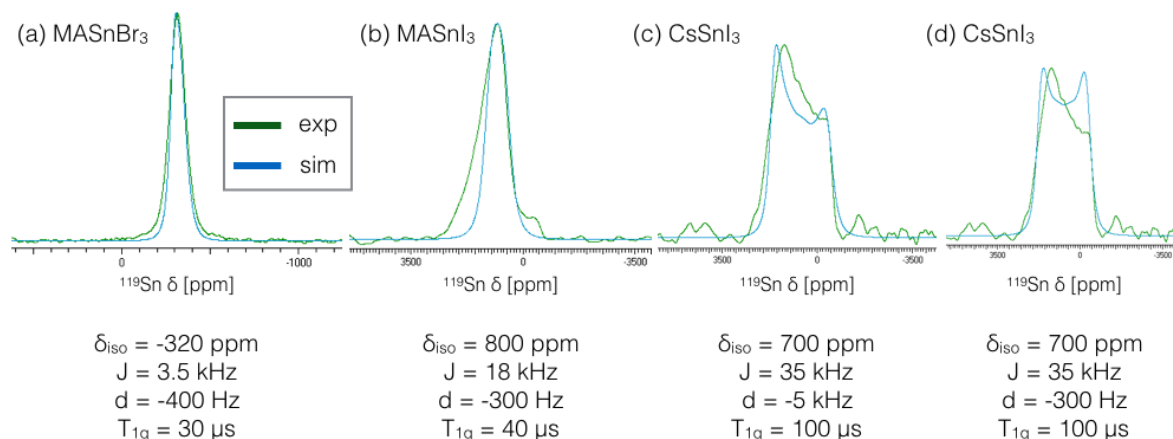

Figure S7. WSolids1 (*WSolids1 ver. 1.21.3*, K. Eichele, Universität Tübingen, 2015) line shape simulations in the extreme narrowing regime of (a) MASnBr<sub>3</sub>, (b) MASnI<sub>3</sub>, (c,d) CsSnI<sub>3</sub>. The relevant simulation parameters are given below the spectra. exp – experimental spectrum, sim – simulated spectrum,  $J$  – <sup>119</sup>Sn-X J-coupling,  $d$  – <sup>119</sup>Sn-X dipole coupling,  $T_{1q}$  – estimated  $T_1$  relaxation of the quadrupolar nucleus. Dipolar couplings expected based on the crystal structures (Sn-X distance = 2.9-3.1 Å) are as follows: <sup>119</sup>Sn-<sup>81</sup>Br:  $d = -410$  Hz, <sup>119</sup>Sn-<sup>79</sup>Br:  $d = -380$  Hz, <sup>119</sup>Sn-<sup>127</sup>I:  $d = -304$  Hz. The width of the spectrum is largely determined by the magnitude of  $J$  while  $d$  introduces a small asymmetry and  $T_{1q}$  determines the line broadening in the extreme narrowing regime. In the case of CsSnI<sub>3</sub>, the asymmetry is reproduced well with a  $d$  value larger than the coupling expected based on the crystal structure (panel c). Using the coupling strength based on the crystal structure leads to a more symmetric simulated spectrum (panel d). Since the spectra are echo-acquired, we expect that the slight asymmetry may be an artifact caused by anisotropic <sup>119</sup>Sn  $T_2$  relaxation.

### Supplementary Note 1

It is worth noting that the CSA patterns of MASnCl<sub>1.5</sub>Br<sub>1.5</sub> (fig. 2f) and MASnBr<sub>2.55</sub>I<sub>0.45</sub> (fig. 3g) yield a single <sup>119</sup>Sn peak while a sizeable CSA is expected in these cases due to asymmetric coordination of the tin(II) site. Taking a typical value of <sup>119</sup>Sn CSA spanning 100 kHz, the dynamic process which leads to its averaging has to occur at a faster rate, *i.e.* with a correlation time shorter than  $1/(100 \text{ kHz}) = 10 \mu\text{s}$ . Since the previously determined halide hopping rates ( $>0.1 \text{ GHz}$ ) correspond to correlation times  $<10 \text{ ns}$ , halide hopping might be the source of CSA averaging.

### Supplementary Note 2

Estimation of the <sup>119</sup>Sn  $T_1$  minimum in the dipole-dipole relaxation mechanism for <sup>119</sup>Sn coupled to <sup>79</sup>Br at 4.7 T:

$$\frac{1}{T_1} = \frac{4}{30} \left( \frac{\mu_0}{4\pi} \right)^2 \frac{\gamma_{\text{Sn}}^2 \gamma_{\text{Br}}^2 \hbar}{r^6} S(S+1) \left( \frac{\tau}{1 + (\omega_{\text{Sn}} - \omega_{\text{Br}})^2 \tau^2} + \frac{3\tau}{1 + \omega_{\text{Sn}}^2 \tau^2} + \frac{6\tau}{1 + (\omega_{\text{Sn}} + \omega_{\text{Br}})^2 \tau^2} \right)$$

where:

permeability of free space,  $\mu_0 = 4\pi \cdot 10^{-7} \text{ V}\cdot\text{s}/(\text{A}\cdot\text{m})$

Planck constant,  $\hbar = 1.054 \cdot 10^{-34} \text{ J}\cdot\text{s}$

$^{119}\text{Sn}$  gyromagnetic ratio,  $\gamma_{\text{Sn}} = -10.03170 \cdot 10^7 \text{ rad}/(\text{T}\cdot\text{s})$

$^{79}\text{Br}$  gyromagnetic ratio,  $\gamma_{\text{Br}} = 6.72562 \cdot 10^7 \text{ rad}/(\text{T}\cdot\text{s})$

$^{119}\text{Sn}$ - $^{79}\text{Br}$  distance in the crystal structure,  $r = 2.945 \text{ \AA} = 2.945 \cdot 10^{-10} \text{ m}$

$^{119}\text{Sn}$  Larmor frequency,  $\omega_{\text{Sn}} = 74.581 \cdot 10^6 \text{ Hz}$

$^{79}\text{Br}$  Larmor frequency,  $\omega_{\text{Br}} = 50.108 \cdot 10^6 \text{ Hz}$

spin of  $^{79}\text{Br}$ ,  $S = 3/2$

correlation time,  $\tau$  – an adjustable parameter

A  $T_1$  minimum of 4.8 s is obtained for  $\tau=13 \text{ ns}$ .

Putting  $^{81}\text{Br}$  gyromagnetic ratio,  $\gamma_{\text{Br}} = 7.24978 \cdot 10^7 \text{ rad}/(\text{T}\cdot\text{s})$  and  $^{81}\text{Br}$  Larmor frequency,  $\omega_{\text{Br}} = 54.0 \cdot 10^6 \text{ Hz}$ , one obtains a  $T_1$  minimum of 4.2 s for  $\tau=13 \text{ ns}$ .

### Supplementary Note 3

The following considerations have been used to distinguish between scalar relaxation of the first and second kind:

**If the system is in the extreme narrowing limit for the  $^{79/81}\text{Br } T_{1Q}$ ,** as the temperature increases:

(i)  $^{79/81}\text{Br } T_{1Q}$  gets longer,  $^{119}\text{Sn } T_2$  gets shorter (since the flipping of the quadrupole partner gets slower).

(ii) Exchange due to halide hopping gets faster.  $^{119}\text{Sn } T_2$  gets longer (since the hopping of the quadrupole partner gets faster)

**If the system is in the slow motion limit for the  $^{79/81}\text{Br } T_{1Q}$ ,** as the temperature increases:

(i)  $^{79/81}\text{Br } T_{1Q}$  gets shorter,  $^{119}\text{Sn } T_2$  gets longer (since the flipping of the quadrupole partner gets faster).

(ii) Exchange due to halide hopping gets faster.  $^{119}\text{Sn } T_2$  gets longer (since the hopping of the quadrupole partner gets faster)

It is therefore only possible to distinguish between scalar relaxation of the first and second kind based on  $^{119}\text{Sn}$  line widths if the system is in the extreme narrowing limit. While variable-temperature relaxation measurements of  $^{79/81}\text{Br } T_{1Q}$  are impractical due to a very large quadrupole coupling constant in  $\text{MASnBr}_3$ , we corroborate that  $^{119}\text{Sn } T_1$  is determined by halide hopping (scalar relaxation of the first kind) based on the resulting activation energy:

1. The activation energy obtained from variable-temperature  $^{119}\text{Sn } T_1$  measurements matches well that from electrical measurements (Table 1 in the main text). The



thermally activated process which is being probed is therefore halide hopping. This confirms that relaxation is driven by halide hopping (i.e. scalar, 1<sup>st</sup> kind).

- Scalar relaxation of the second kind would lead to an activation energy of the process which drives  $^{79/81}\text{Br } T_{1Q}$ , which is typically a Raman process related to lattice modes. Since Raman and phonon spectra fall in the far infrared to THz range, the activation energies corresponding to those processes are  $<0.03$  eV, i.e. an order of magnitude less than what is found experimentally.

## Details of NMR measurements

Table S1. Chemical shifts and peak widths of the multi-field variable-temperature  $T_1$  relaxation data of  $\text{MASnBr}_3$ , measured using a saturation recovery sequence and a Hahn echo in the quasi-static regime: total echo duration 40  $\mu\text{s}$  at 17.6 and 4.7 T, and 66.7  $\mu\text{s}$  at 9.4 T. The uncertainties of the monoexponential  $T_1$  fit are  $<1\%$ .

Magnetic field strength: 17.6 T

| Temperature [K] | $^{119}\text{Sn}$ chemical shift [ppm] | fwhm [kHz] | $T_1$ [ms]           |
|-----------------|----------------------------------------|------------|----------------------|
| 308             | -315                                   | 10.7       | 9.66                 |
| 326             | -312                                   | 10.9       | 5.47                 |
| 343             | -310                                   | 9.5        | 2.95                 |
| 356             | -306                                   | 8.6        | 1.87                 |
| 372             | -302                                   | 7.8        | 1.12                 |
| 389             | -298                                   | 6.6        | 0.706                |
| 405             | -293                                   | 5.6        | 0.465                |
| 421             | -287                                   | 5.8        | 0.305                |
| 438             | -281                                   | 5.9        | 0.235                |
| 454             | -275                                   | 7.0        | 0.127                |
| 474             | -267                                   | 6.8        | 0.101                |
| 490             | -266                                   | 9.9        | n.d. (decomposition) |

Magnetic field strength: 9.4 T

| Temperature | $^{119}\text{Sn}$ chemical shift [ppm] | fwhm [kHz] | $T_1$ [ms] |
|-------------|----------------------------------------|------------|------------|
| 253         | -322                                   | 10.7       | 201        |
| 268         | -324                                   | 11.6       | 78         |
| 286         | -317                                   | 10.8       | 30         |
| 313         | -313                                   | 10.1       | 10         |
| 347         | -307                                   | 8.2        | 3.3        |

Magnetic field strength: 4.7 T

| Temperature | $^{119}\text{Sn}$ chemical shift [ppm] | fwhm [kHz] | $T_1$ [ms] |
|-------------|----------------------------------------|------------|------------|
| 317         | -334                                   | 10.5       | 8.271      |
| 339         | -314                                   | 8.7        | 4.151      |
| 347         | -310                                   | 7.5        | 2.426      |
| 360         | -314                                   | 6.9        | 1.644      |
| 368         | -310                                   | 6.1        | 1.138      |
| 382         | -306                                   | 4.7        | 0.653      |

|     |      |     |       |
|-----|------|-----|-------|
| 393 | -302 | 3.9 | 0.442 |
| 405 | -300 | 4.2 | 0.329 |
| 418 | -295 | 4.3 | 0.196 |
| 431 | -291 | 4.3 | 0.133 |
| 455 | -286 | 5.8 | 0.071 |

Table S2. An Arrhenius fit of the  $T_1$  relaxation data (abscissa:  $1/T$ , ordinate:  $\ln(T_1/s)$ ) to the equation:  $y = a + b \cdot x$  for  $\text{MASnBr}_3$ . The errors of the least-squares fit are given as one standard deviation. The error of the average is given as one standard deviation of the average.  $R = 8.3144598 \text{ J/(K}\cdot\text{mol)}$ .

| magnetic field strength [T] | a                 | b             | $E_a = b \cdot R/1000$ [kJ/mol] |
|-----------------------------|-------------------|---------------|---------------------------------|
| 17.6                        | $-18.01 \pm 0.15$ | $4165 \pm 57$ | $34.1 \pm 0.5$                  |
| 9.4                         | $-16.75 \pm 0.41$ | $3811 \pm 12$ | $31.8 \pm 0.1$                  |
| 4.7                         | $-20.74 \pm 0.29$ | $5123 \pm 11$ | $42.7 \pm 0.1$                  |
|                             |                   | average:      | $36.2 \pm 5.7$                  |

Table S3.  $^{119}\text{Sn}$   $T_1$  values measured using a saturation-recovery sequence and fitted using a monoexponential function. The uncertainties of the fit are  $<1\%$ .

| compound                             | $^{119}\text{Sn}$ $T_1$ [s] |
|--------------------------------------|-----------------------------|
| $\text{MASnCl}_3$                    | 60                          |
| $\text{MASnCl}_{2.7}\text{Br}_{0.3}$ | 29.7                        |
| $\text{MASnCl}_{2.1}\text{Br}_{0.9}$ | 2.59                        |
| $\text{MASnCl}_{1.5}\text{Br}_{1.5}$ | 0.352                       |
| $\text{MASnBr}_3$                    | 0.0053                      |
| $\text{MASnBr}_{2.7}\text{I}_{0.3}$  | 0.0011                      |
| $\text{MASnBr}_{2.1}\text{I}_{0.9}$  | 0.000164                    |
| $\text{MASnI}_3$                     | 0.000545                    |
| $\beta\text{-Sn}$                    | 0.00012                     |
| $\text{SnCl}_2$                      | 26.4                        |
| $\text{SnBr}_2$                      | 1.12                        |
| $\text{SnI}_2$                       | 0.528                       |
| $\text{SnBr}_4$                      | 1.95                        |
| $\text{SnI}_4$                       | 11.5                        |
| $\text{MA}_2\text{SnBr}_6$           | 9.9                         |
| $\text{MA}_2\text{SnI}_6$            | 0.001                       |

Table S4. Acquisition and processing parameters used for the spectra in the main text.

| $^{119}\text{Sn}$ spectra            |        |                   |                 |                        |                             |
|--------------------------------------|--------|-------------------|-----------------|------------------------|-----------------------------|
| composition                          | Figure | recycle delay [s] | number of scans | acquisition time [min] | Lorentzian apodization [Hz] |
| $\text{SnCl}_2$                      | 2      | 34                | 32              | 18                     | 200                         |
| $\text{SnBr}_2$                      |        | 1.5               | 6204            | 155                    | 1000                        |
| $\text{MASnCl}_3$                    |        | 50                | 1384            | 1153                   | 500                         |
| $\text{MASnCl}_{2.7}\text{Br}_{0.3}$ |        | 40                | 1752            | 1168                   | 500                         |

|                                                                              |     |       |                  |                   |       |       |
|------------------------------------------------------------------------------|-----|-------|------------------|-------------------|-------|-------|
| MASnCl <sub>2.1</sub> Br <sub>0.9</sub>                                      |     | 3     | 1892             | 95                | 4000  |       |
| MASnCl <sub>1.5</sub> Br <sub>1.5</sub>                                      |     | 0.5   | 3900             | 33                | 1000  |       |
| MASnBr <sub>3</sub>                                                          |     | 0.05  | 4096             | 3                 | 1000  |       |
| SnBr <sub>4</sub>                                                            |     | 2.5   | 2260             | 94                | 1000  |       |
| MA <sub>2</sub> SnBr <sub>6</sub>                                            |     | 13    | 680              | 147               | 2000  |       |
| SnI <sub>2</sub>                                                             | 3   | 1     | 2224             | 37                | 2000  |       |
| MASnI <sub>3</sub>                                                           |     | 0.01  | 32768 ×3 offsets | 16                | 20000 |       |
| MASnCl <sub>2.7</sub> I <sub>0.3</sub> (fast)                                |     | 0.05  | 55800            | 47                | 10000 |       |
| MASnCl <sub>2.7</sub> I <sub>0.3</sub> (slow)                                |     | 50    | 2008             | 1673              | 100   |       |
| MASnBr <sub>0.9</sub> I <sub>2.1</sub>                                       |     | 0.01  | 3654026          | 609               | 10000 |       |
| MASnBr <sub>1.5</sub> I <sub>1.5</sub>                                       |     | 0.01  | 142604           | 24                | 10000 |       |
| MASnBr <sub>2.1</sub> I <sub>0.9</sub>                                       |     | 0.01  | 135088           | 23                | 8000  |       |
| MASnBr <sub>2.55</sub> I <sub>0.45</sub>                                     |     | 0.001 | 81060            | 1                 | 1000  |       |
| MASnBr <sub>2.7</sub> I <sub>0.3</sub>                                       |     | 0.05  | 21940            | 18                | 2000  |       |
| SnI <sub>4</sub>                                                             |     | 20    | 1832             | 611               | 2000  |       |
| MA <sub>2</sub> SnI <sub>6</sub>                                             |     | 0.005 | 55980            | 5                 | 1000  |       |
| FASnI <sub>3</sub>                                                           |     | 4     | 0.01             | 31624 ×5 offsets  | 26    | 20000 |
| CsSnI <sub>3</sub>                                                           |     |       | 0.001            | 420560 ×3 offsets | 21    | 20000 |
| CsSnBr <sub>3</sub>                                                          |     |       | 0.01             | 53028             | 9     | 1000  |
| MA <sub>0.5</sub> FA <sub>0.5</sub> SnBr <sub>3</sub>                        |     |       | 0.015            | 10240             | 3     | 1000  |
| FASnBr <sub>3</sub>                                                          | 0.1 |       | 2048             | 3                 | 1000  |       |
| MA <sub>0.5</sub> FA <sub>0.5</sub> SnCl <sub>3</sub>                        | 60  |       | 1240             | 1240              | 500   |       |
| FASnCl <sub>3</sub>                                                          | 60  |       | 964              | 964               | 500   |       |
| CsSnCl <sub>3</sub><br>(monoclinic)                                          | 60  |       | 876              | 876               | 500   |       |
| CsSnCl <sub>3</sub> (cubic)                                                  | 5   |       | 128              | 11                | 200   |       |
| CsSnCl <sub>1.5</sub> Br <sub>1.5</sub>                                      | 0.5 |       | 3300             | 28                | 100   |       |
| MASnBr <sub>3</sub><br>(degraded)                                            | 5   | 13    | 4972             | 1077              | 500   |       |
| SnO <sub>2</sub>                                                             |     | 12    | 128              | 26                | 100   |       |
| SnO <sub>2</sub> + 10 mol%<br>SnBr <sub>2</sub>                              |     | 12    | 356              | 71                | 100   |       |
| FASnBr <sub>3</sub> (degraded<br>at RT)                                      |     | 13    | 4796             | 1039              | 1000  |       |
| FASnBr <sub>3</sub> (degraded<br>at 250 °C)                                  |     | 13    | 3300             | 715               | 500   |       |
| CsSnBr <sub>3</sub><br>(degraded),<br>perovskite region                      |     | 0.01  | 53028            | 9                 | 1000  |       |
| CsSnBr <sub>3</sub><br>(degraded),<br>decomposition<br>products              |     | 13    | 968              | 210               | 2000  |       |
| MASnI <sub>3</sub><br>(degraded),<br>perovskite region                       |     | 0.01  | 32768            | 5                 | 10000 |       |
| MASnI <sub>3</sub><br>(degraded),<br>MA <sub>2</sub> SnI <sub>6</sub> region |     | 0.005 | 55980            | 5                 | 1000  |       |

|                                                              |  |       |          |      |      |
|--------------------------------------------------------------|--|-------|----------|------|------|
| MASnI <sub>3</sub><br>(degraded), SnO <sub>2</sub><br>region |  | 12    | 2280     | 456  | 1000 |
| MASnI <sub>3</sub><br>(degraded), β-Sn<br>region             |  | 0.001 | 12240000 | 965* | 2000 |
| FASnI <sub>3</sub> (degraded)                                |  | 0.005 | 46844    | 4    | 1000 |
| CsSnI <sub>3</sub> (degraded)                                |  | 0.1   | 58112    | 97   | 1000 |
| β-tin (metal)                                                |  | 0.01  | 15892    | 3    | 2000 |

\*comprising safety delays to reduce the duty cycle of the probe (effective recycle delay of 4.7 ms)

Table S5. Summary of the degradation products of tin(II) halide perovskites detected using <sup>119</sup>Sn MAS NMR. Note that not all possible degradation products were detected for all samples - see the discussion in the main text for details.

| Material            | Degradation conditions                        | Figure in the main text | Detected degradation products                                                  |
|---------------------|-----------------------------------------------|-------------------------|--------------------------------------------------------------------------------|
| MASnBr <sub>3</sub> | 1 h at 250 °C in air                          | 5b                      | MA <sub>2</sub> SnBr <sub>6</sub> , SnO <sub>2</sub> ,<br>(SnBr <sub>4</sub> ) |
| FASnBr <sub>3</sub> | 5 days at RT, in air                          | 5f                      | FA <sub>2</sub> SnBr <sub>6</sub> , SnO <sub>2</sub> ,                         |
| FASnBr <sub>3</sub> | Same sample as above + 0.5 h at 250 °C in air | 5g                      | FA <sub>2</sub> SnBr <sub>6</sub> , SnO <sub>2</sub> ,                         |
| CsSnBr <sub>3</sub> | 0.5 h at 350 °C in air                        | 5i                      | Cs <sub>2</sub> SnBr <sub>6</sub> , SnO <sub>2</sub>                           |
| MASnI <sub>3</sub>  | 1 h at 150 °C in air                          | 5k                      | MA <sub>2</sub> SnI <sub>6</sub> , SnO <sub>2</sub> ,<br>metallic tin          |
| FASnI <sub>3</sub>  | 1 h at RT in air                              | 5m                      | FA <sub>2</sub> SnI <sub>6</sub>                                               |
| CsSnI <sub>3</sub>  | 3 h at 100 °C in air                          | 5o                      | Cs <sub>2</sub> SnI <sub>6</sub>                                               |

## XRD data

Powder X-ray diffraction patterns were recorded on an X'Pert MPD PRO (Panalytical) diffractometer equipped with a ceramic tube (Cu anode,  $\lambda = 1.54060 \text{ \AA}$ ), a secondary graphite (002) monochromator and an RTMS X'Celerator (Panalytical) in an angle range of  $2\theta = 5^\circ$  to  $40^\circ$ , by step scanning with a step of 0.02 degree.

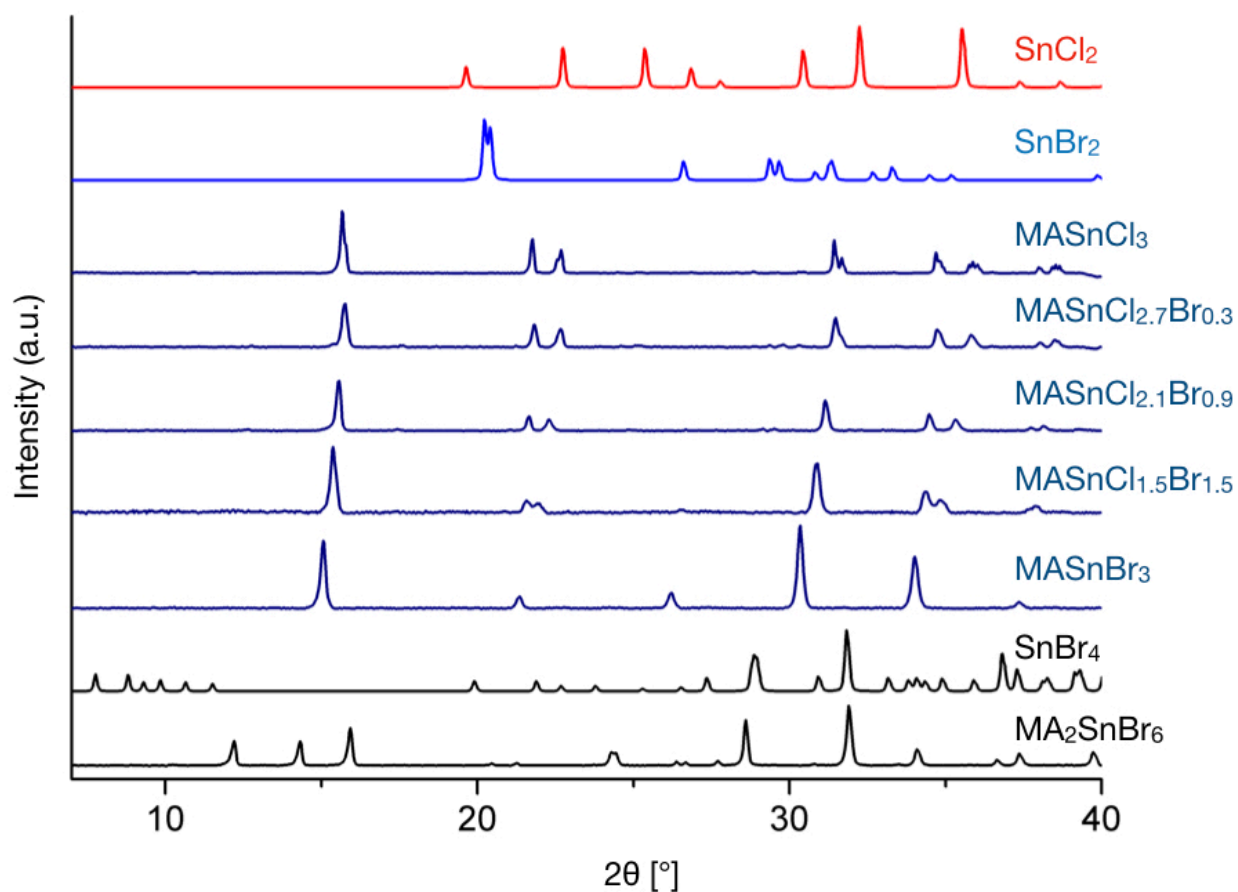

Figure S8. Powder X-ray diffraction patterns of the materials reported in Figure 2 of the main text.

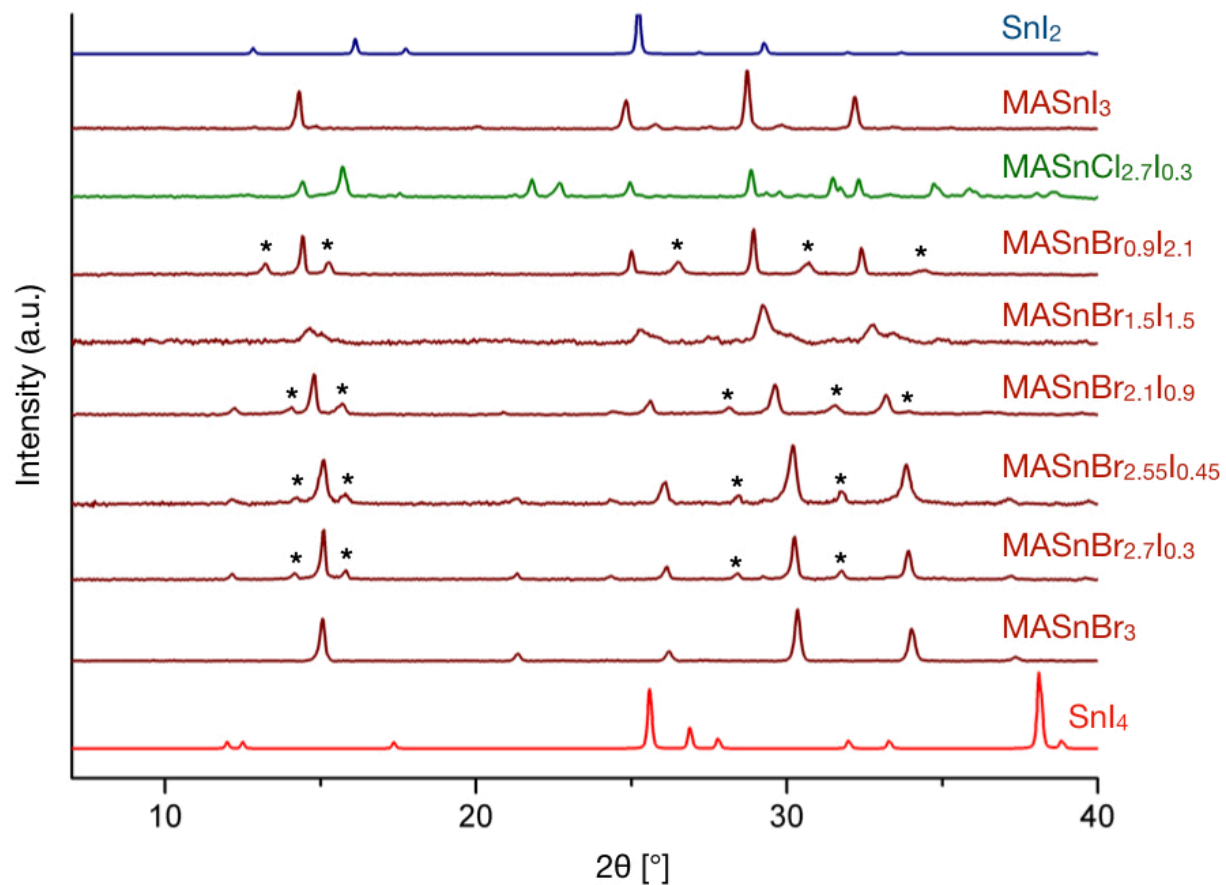

Figure S9. Powder X-ray diffraction patterns of the materials reported in Figure 3 of the main text. The asterisks indicate the corresponding oxidized  $\text{A}_2\text{SnX}_6$  phase which slowly forms during the XRD measurement which is carried out in air.

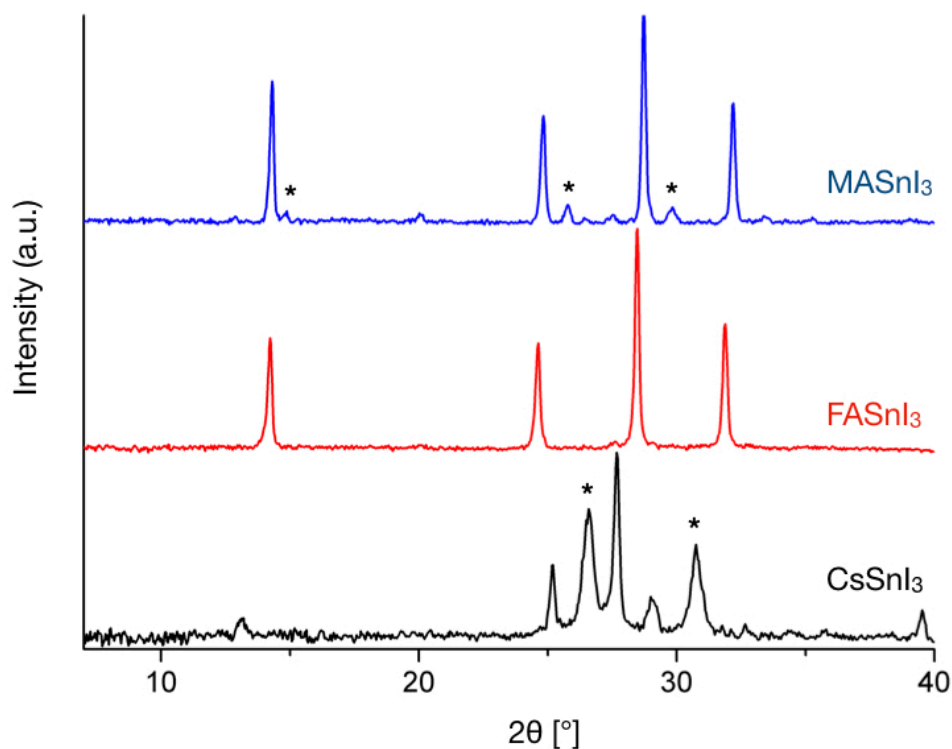

Figure S10. Powder X-ray diffraction patterns of the materials reported in Figure 4a-c of the main text. The asterisks indicate the corresponding oxidized  $A_2SnX_6$  phase which slowly forms during the XRD measurement which is carried out in air.

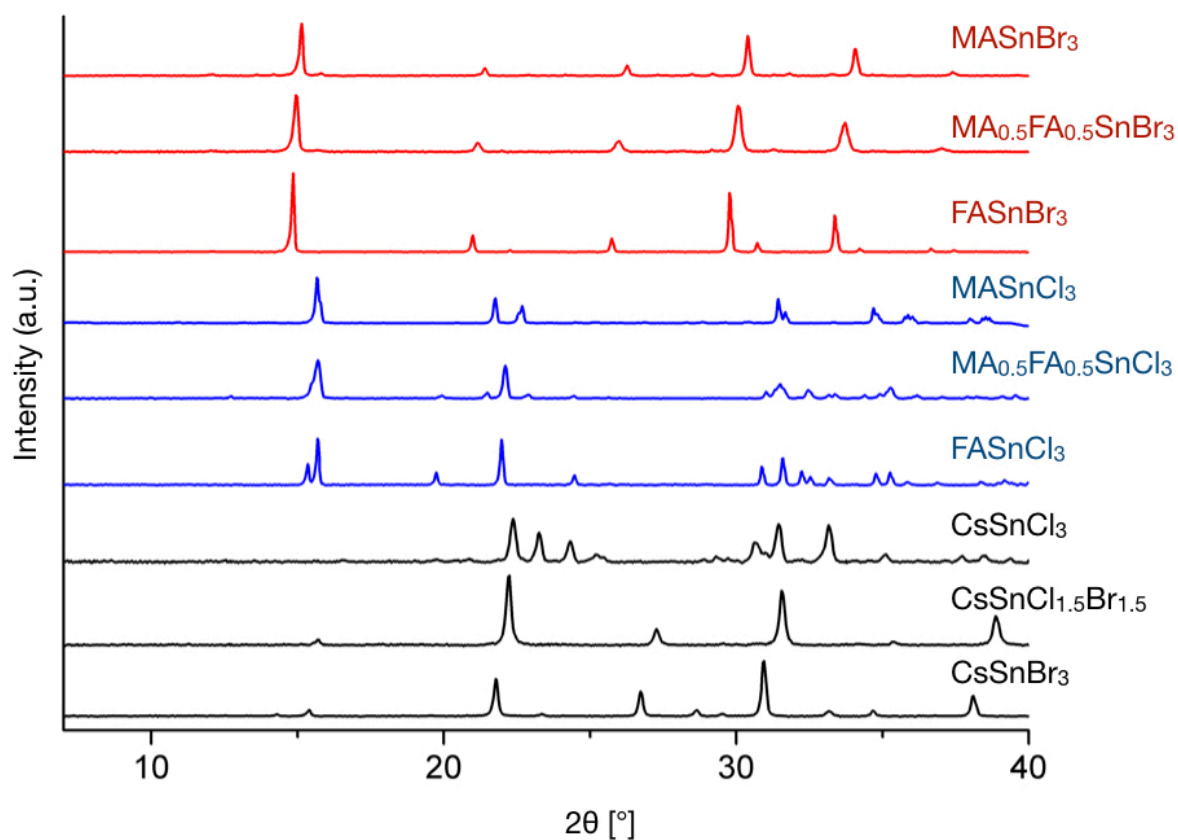

Figure S11. Powder X-ray diffraction patterns of the materials reported in Figure 4d-m of the main text.

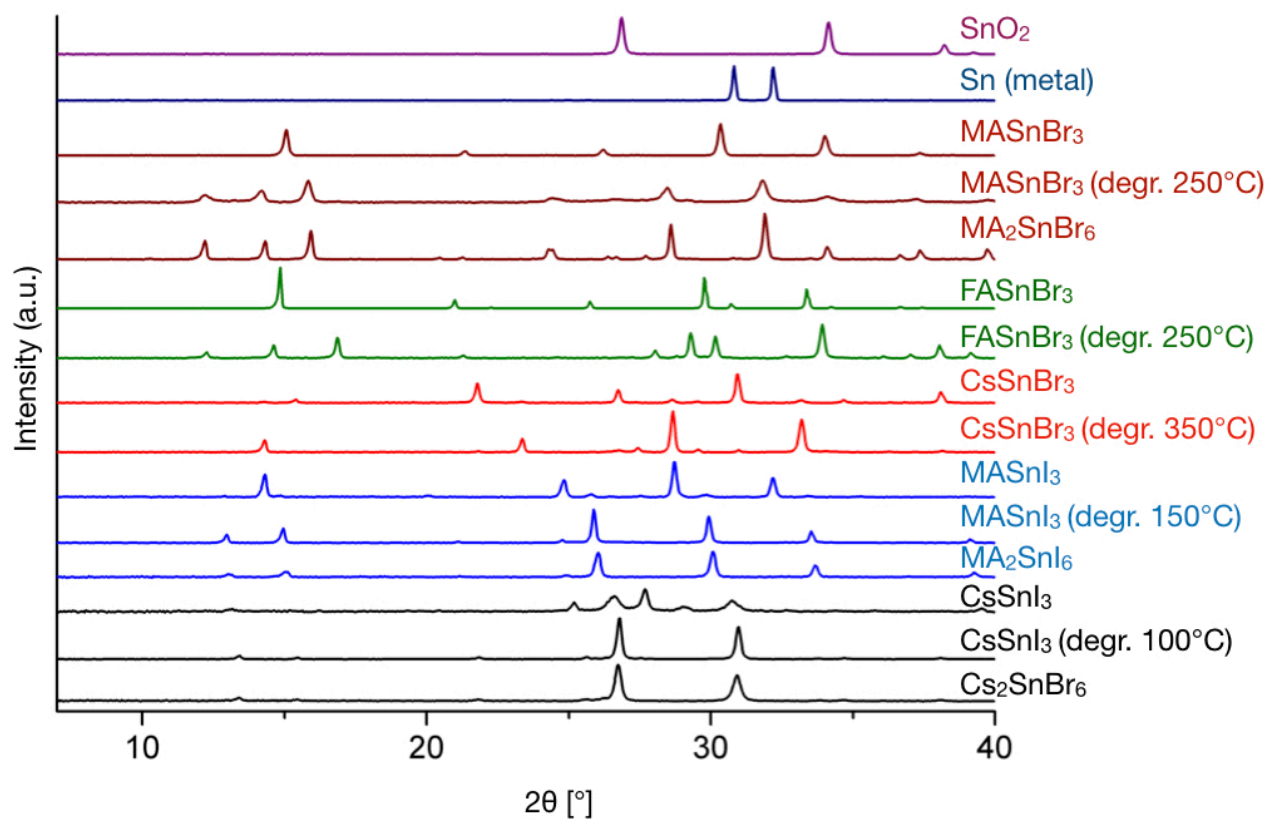

Figure S12. Powder X-ray diffraction patterns of the materials reported in Figure 5 of the main text.



- (1) Phase Transitions in CsSnCl<sub>3</sub> and CsPbBr<sub>3</sub> An NMR and NQR Study :  
Zeitschrift für Naturforschung A  
<https://www.degruyter.com/view/j/zna.1991.46.issue-4/zna-1991-0406/zna-1991-0406.xml> (accessed Aug 23, 2019).
- (2) Kubicki, D. J.; Prochowicz, D.; Hofstetter, A.; Zakeeruddin, S. M.; Grätzel, M.; Emsley, L. Phase Segregation in Cs-, Rb- and K-Doped Mixed-Cation (MA)<sub>x</sub>(FA)<sub>1-x</sub>PbI<sub>3</sub> Hybrid Perovskites from Solid-State NMR. *J. Am. Chem. Soc.* **2017**, *139* (40), 14173–14180. <https://doi.org/10.1021/jacs.7b07223>.
- (3) Grutzner, J. B.; Stewart, K. W.; Wasylshen, R. E.; Lumsden, M. D.; Dybowski, C.; Beckmann, P. A. A New Mechanism for Spin–Lattice Relaxation of Heavy Nuclei in the Solid State: <sup>207</sup>Pb Relaxation in Lead Nitrate. *J. Am. Chem. Soc.* **2001**, *123* (29), 7094–7100. <https://doi.org/10.1021/ja0040924>.
